# Supplementary material for: Geological processes mediate a microbial dispersal loop in the deep biosphere
Source: PubMed Central journal article supplement — Sci Adv. 2022 Aug 26;8(34):eabn3485. doi: 10.1126/sciadv.abn3485 (PMC9417182; doi:10.1126/sciadv.abn3485), 2022-08-26
Supplement: sciadv.abn3485_sm.pdf [file sciadv.abn3485_sm.pdf]

Supplementary Materials for  
**Geological processes mediate a microbial dispersal loop in the deep biosphere**

Daniel A. Gittins *et al.*

Corresponding author: Daniel A. Gittins, [daniel.gittins@ucalgary.ca](mailto:daniel.gittins@ucalgary.ca)

*Sci. Adv.* **8**, eabn3485 (2022)  
DOI: 10.1126/sciadv.abn3485

**The PDF file includes:**

Figs. S1 to S6  
Legend for movie S1  
Legends for tables S1 to S9  
References

**Other Supplementary Material for this manuscript includes the following:**

Movie S1  
Tables S1 to S9

**Other Supplementary Materials for this manuscript include the following:**

**Movie S1.** Seabed hydrocarbon seepage.

**Table S1.** Marine sediment core site locations and sample descriptions.

**Table S2.** Hydrocarbon geochemical measurements on marine sediment cores.

**Table S3.** ASV table with taxonomic classification of 16S rRNA gene amplicon libraries.

**Table S4.** Analysis of similarity (ANOSIM) test results.

**Table S5.** IndicSpecies Stat values.

**Table S6.** Taxonomic assignment.

**Table S7.** Metagenome-assembled genomes (MAGs).

**Table S8.** Summary of genes detected in metagenome-assembled genomes (MAGs).

**Table S9.** Sporulation genes annotated against Pfam, TIGRFAM and Swiss-Prot databases.

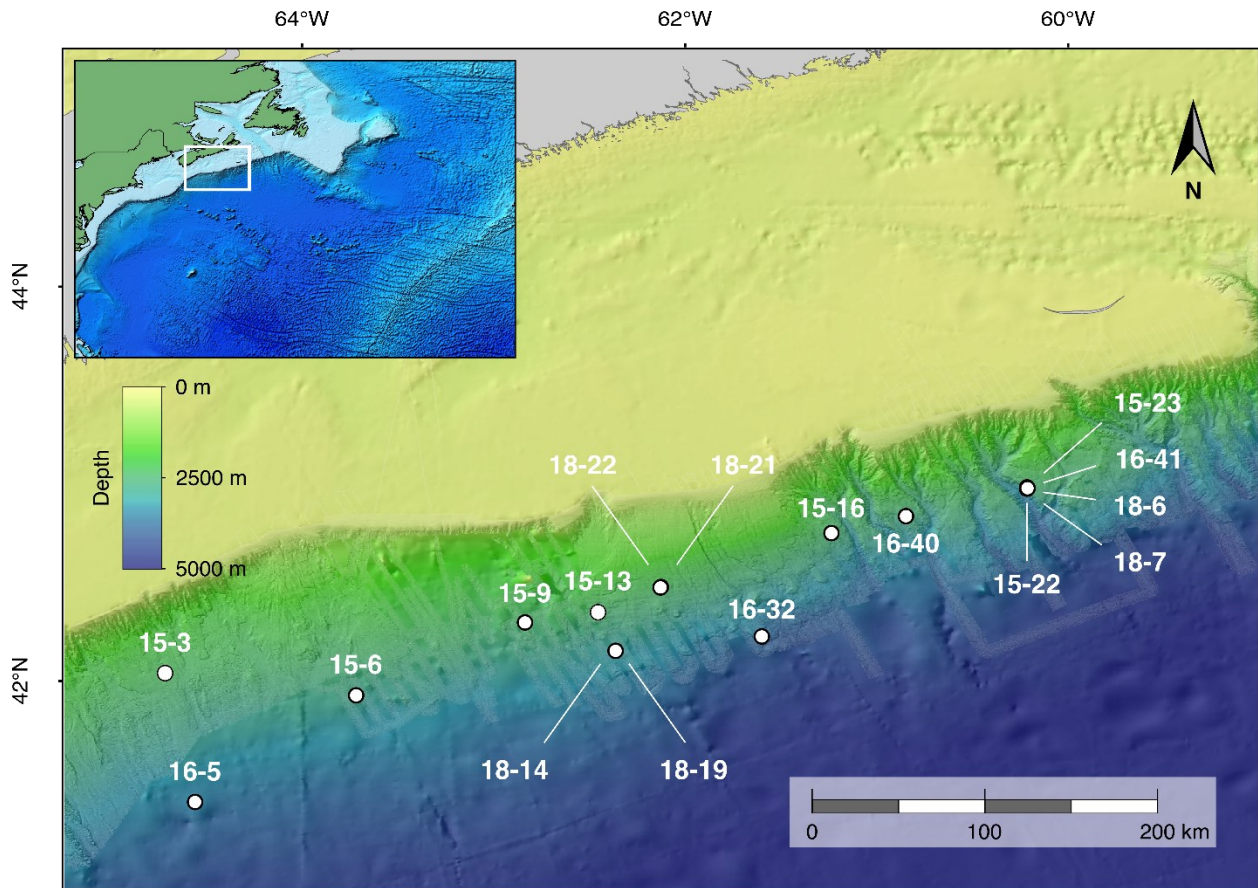

**Fig. S1. Deep sea study sites in the NW Atlantic Ocean.** Sediment coring locations on the Scotian Slope. The inset shows the extent of the 20,000 km<sup>2</sup> study area, approximately 200 km off the east coast of Nova Scotia, Canada, and 2,200 km west of the mid-Atlantic ridge (inset). Bathymetric map from the General Bathymetric Chart of the Oceans (GEBCO, [www.gebco.net](http://www.gebco.net)) and National Oceanic and Atmospheric Administration (NOAA, [www.ngdc.noaa.gov/](http://www.ngdc.noaa.gov/)).

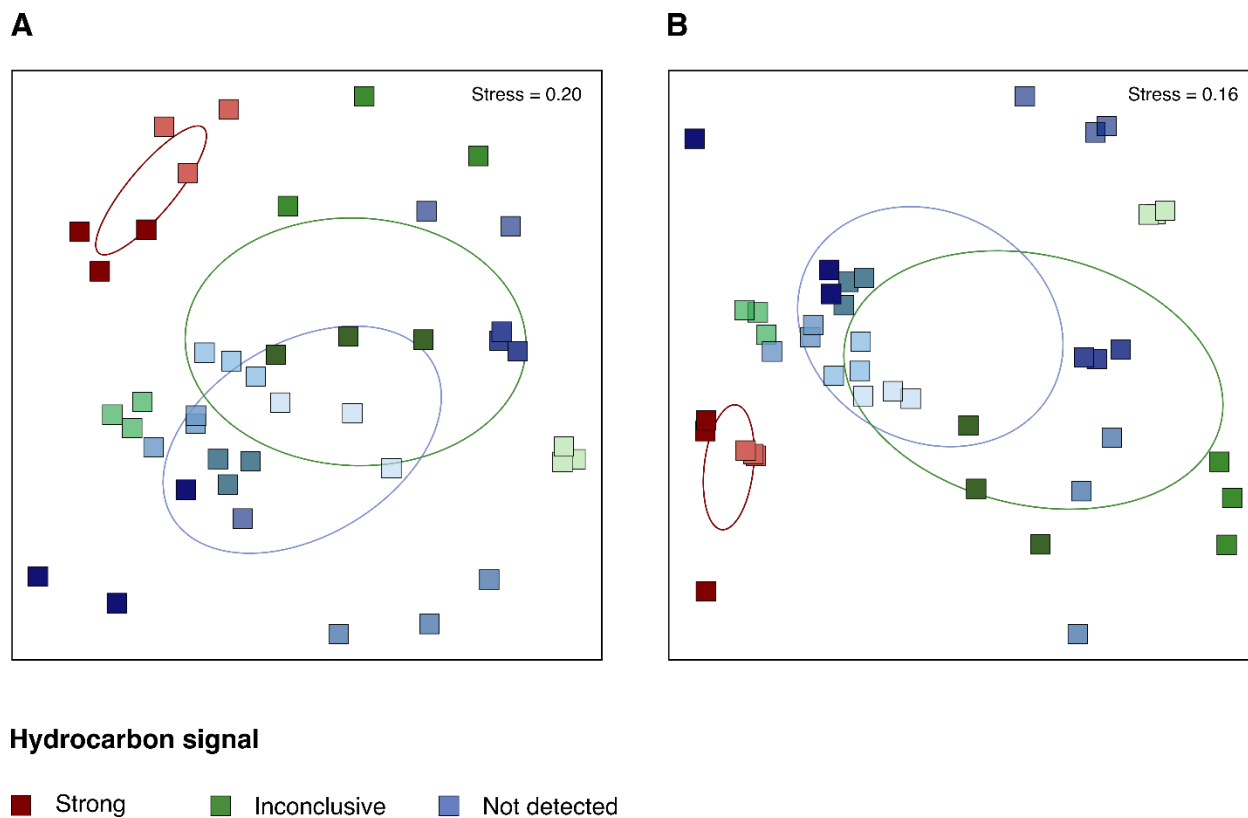

**Fig. S2. Microbial community variance between core sites.** Non-metric multidimensional scaling of the Bray-Curtis dissimilarity of the microbial community composition after sediment incubation at (A) 40°C and (B) 60°C (for 50°C incubations, see Fig. 2B). Red symbols indicate sites with strong geochemical evidence of hydrocarbons ( $n=2$ ), green symbols indicate sites with inconclusive hydrocarbon signals ( $n=4$ ), and blue symbols indicate sites where hydrocarbons were not detected ( $n=8$ ). Triplicate amplicon libraries are plotted for each condition. Sites with strong thermogenic hydrocarbon signals have distinct microbial populations after high temperature incubation (see also table S4), relative to the sites without thermogenic hydrocarbon signals. This is indicated by standard deviation ellipses of the hydrocarbon groups.

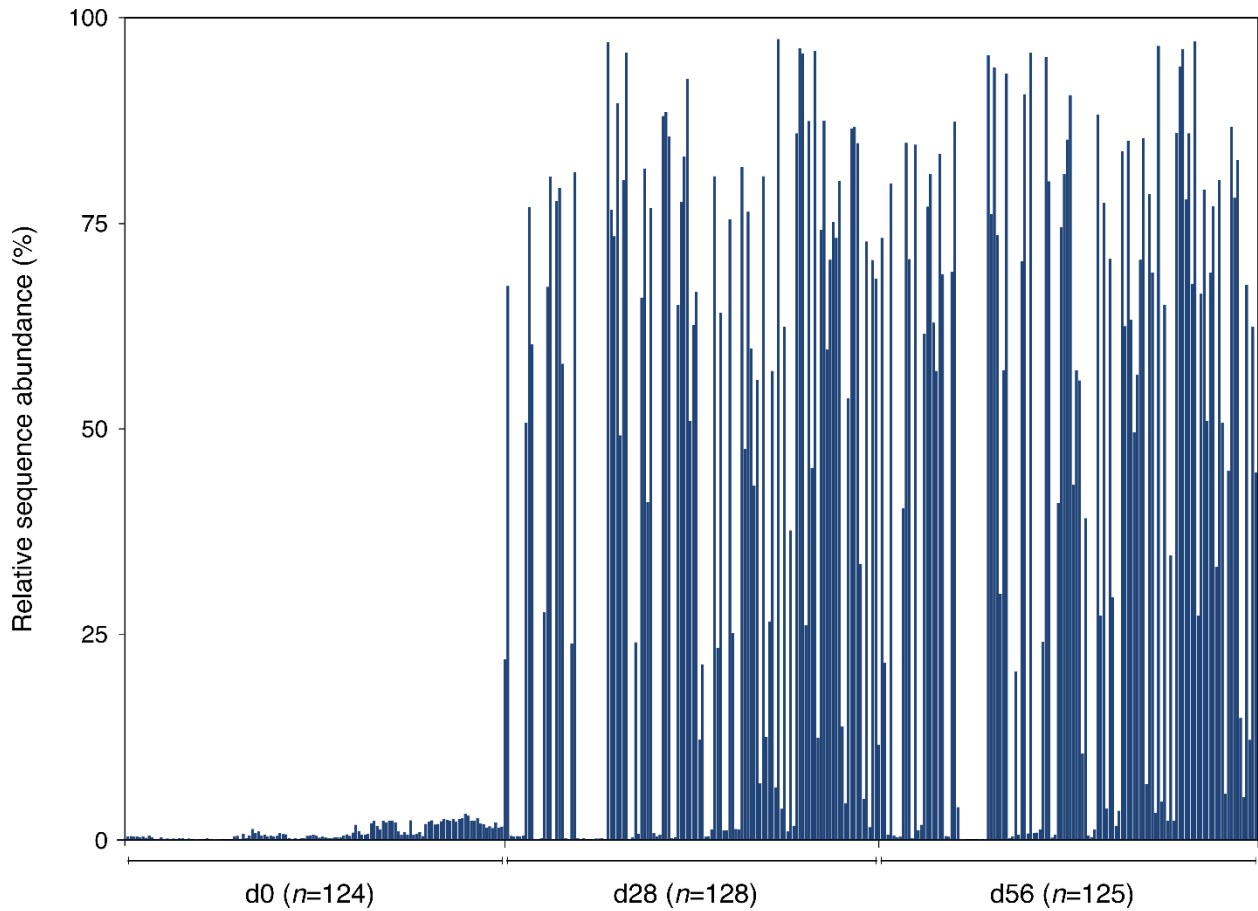

**Fig. S3. Endospore germination and enrichment after high temperature incubation.** Relative sequence abundance of *Firmicutes* in 372 libraries of 16S rRNA gene amplicons before (d0; post-pasteurisation) and after 28 and 56 days of anoxic incubation at 40, 50, or 60°C (see table S3 for detailed microbial community compositions). Each blue bar represents a single library of 4,635 subsampled reads, and demonstrates an increased proportion of *Firmicutes* following 28 and 56 days of incubation. The proportion of *Firmicutes* in d0 libraries was on average 0.9%, and was even lower in libraries from unpasteurized surface sediments, which are dominated by cold-adapted populations able to colonize seabed environments including hydrocarbon seeps (23).

MK766147.1, H2-producing continuous bioreactor  
LC123718.1, Deep subterrestrial environments - Japan  
LC123718, Deep groundwater - southeastern Kyushu, Japan  
**ASV279, *Caldicoprobacter***  
**ASV496, *Caldicoprobacter***  
GU118676, Coral - Caribbean  
GU118676.1, Coral - Caribbean  
GU118758.1, Coral - Caribbean  
JQ515772, Coral - Caribbean  
JQ515767.1, Coral - Caribbean  
JQ515767, Coral - Caribbean  
AF113543, *Thermohalobacter berrensii*, Solar saltern - Berre Lagoon, France  
KP004425.1, Deep-sea hydrothermal vent - Southwest Indian Ridge, East Pacific and South Atlantic  
KC533829.1, Hydrothermal vent - East Pacific Ocean  
KC901624.1, Hydrothermal vent sediment, 57.6°C fluids - Guaymas Basin, Mexico  
KP004433.1, Deep-sea hydrothermal vent - Southwest Indian Ridge, East Pacific and South Atlantic  
**ASV366, *Caloranaerobacter***  
NR 135860.1, Deep-sea hydrothermal vent, 30-75°C incubation - Pacific Ocean  
FN396790.1, Marine surface sediment, 50°C incubation - Smeerenburgfjorden, Svalbard  
KX955408.1, Water column and sediment - Aarhus Bay, Denmark  
FN396787.1, Marine surface sediment, 50°C incubation - Smeerenburgfjorden, Svalbard  
FN396776.1, Marine surface sediment, 50°C incubation - Smeerenburgfjorden, Svalbard  
FN396778.1, Marine surface sediment, 50°C incubation - Smeerenburgfjorden, Svalbard  
**ASV147, *Caloranaerobacter***  
**ASV516, *Caloranaerobacter***  
**ASV615, *Caloranaerobacter***  
AJ431243, *Alvinella pompejana* white tubes - East Pacific Rise  
AJ320233, *Caminicella sporogenes*, Deep sea hydrothermal vent - East Pacific Rise  
AJ431244, *Alvinella pompejana* white tubes - East Pacific Rise  
AJ431245, *Alvinella pompejana* white tubes - East Pacific Rise  
AJ874301, Hydrothermal black chimney, 60°C enrichment culture - Rainbow field, Mid-Atlantic Ridge  
AJ874305, Hydrothermal black chimney, 60°C enrichment culture - Rainbow field, Mid-Atlantic Ridge  
AJ874310, Hydrothermal black chimney, 60°C enrichment culture - Rainbow field, Mid-Atlantic Ridge  
AJ874312, Hydrothermal black chimney, 60°C enrichment culture - Rainbow field, Mid-Atlantic Ridge  
**ASV43, *Caminicella***  
KX956036.1, Water column and sediment - Aarhus Bay, Denmark  
MN463066.1, Marine sediment  
JN539926.1, Hypersaline microbial mat, Guerrero Negro - Baja California Sur, Mexico  
JN538308.1, Hypersaline microbial mat, Guerrero Negro - Baja California Sur, Mexico  
JN539026.1, Hypersaline microbial mat, Guerrero Negro - Baja California Sur, Mexico  
FN667354, Compost - Lahti, Finland  
FN396772, Marine surface sediment, 50°C incubation - Smeerenburgfjorden, Svalbard  
KM823684, River sediment - China  
JQ407283, Mud volcano, Lei-gong-huo - eastern Taiwan  
HQ916619, Mud volcano, Lei-gong-huo - eastern Taiwan  
HQ916607, Mud volcano, Lei-gong-huo - eastern Taiwan  
KF758687, Deep sea water  
KF964589, Wetland soil - Ebinur lake  
JN539026, Hypersaline mat, Guerrero Negro - Baja California Sur, Mexico  
JN537682, Hypersaline mat, Guerrero Negro - Baja California Sur, Mexico  
JQ407274, Mud volcano, Lei-gong-huo - eastern Taiwan  
FN356285, Produced water, 80°C in situ oil reservoir temperature - Dan and Halfdan oil fields, North Sea  
FN356288, Produced water, 80°C in situ oil reservoir temperature - Dan and Halfdan oil fields, North Sea  
FN356295, Produced water, 80°C in situ oil reservoir temperature - Dan and Halfdan oil fields, North Sea  
DQ647144, Produced water, 70°C in situ oil field temperature - Troll Formation, North Sea  
FN356335, Produced water, 80°C in situ oil reservoir temperature - Dan and Halfdan oil fields, North Sea  
FN356327, Produced water, 80°C in situ oil reservoir temperature - Dan and Halfdan oil fields, North Sea  
FN356332, Produced water, 80°C in situ oil reservoir temperature - Dan and Halfdan oil fields, North Sea  
FN356342, Produced water, 80°C in situ oil reservoir temperature - Dan and Halfdan oil fields, North Sea  
FN356328, Produced water, 80°C in situ oil reservoir temperature - Dan and Halfdan oil fields, North Sea  
FN356302, Produced water, 80°C in situ oil reservoir temperature - Dan and Halfdan oil fields, North Sea  
FN356340, Produced water, 80°C in situ oil reservoir temperature - Dan and Halfdan oil fields, North Sea  
FN356237, Produced water, 80°C in situ oil reservoir temperature - Dan and Halfdan oil fields, North Sea  
FN356323, Produced water, 80°C in situ oil reservoir temperature - Dan and Halfdan oil fields, North Sea  
DQ647125, Produced water, 70°C in situ oil field temperature - Troll Formation, North Sea  
FN356239, Produced water, 80°C in situ oil reservoir temperature - Dan and Halfdan oil fields, North Sea  
FN356341, Produced water, 80°C in situ oil reservoir temperature - Dan and Halfdan oil fields, North Sea  
FN356304, Produced water, 80°C in situ oil reservoir temperature - Dan and Halfdan oil fields, North Sea  
FN356314, Produced water, 80°C in situ oil reservoir temperature - Dan and Halfdan oil fields, North Sea  
FN356303, Produced water, 80°C in situ oil reservoir temperature - Dan and Halfdan oil fields, North Sea  
X77837  
GU118213, Coral - Caribbean  
KC668910, Coral - Red Sea  
KC668846.1, Coral - Red Sea  
KC668846, Coral - Red Sea  
KC668837, Coral - Red Sea  
KP305708.1, Reef coral - Luhuitou fringing reef, China  
HQ606285.1, Marine sediments - South China Sea  
KT973497.1, Intertidal outcrops - Isla de Mona, Puerto Rico  
GQ267134.1, Hydrothermal sediments - Mothra Field, Juan de Fuca Ridge  
HQ696463.1, Deep sea sediment - Indian Ocean  
**ASV41, *Paramaledivibacter***  
FR695371.1, Marine sediment, 25°C incubation - Aarhus Bay, Denmark  
DQ831102.1  
**ASV2045, *Paramaledivibacter***  
**ASV60, *Paramaledivibacter***  
KX062021, Hot spring, Polichnitos - Lesvos, Greece  
AF458779, *Paramaledivibacter caminithermalis*, Deep sea hydrothermal chimney - Atlantic Ocean Ridge  
FJ203551.1, Coral - Caribbean  
**ASV165, *Paramaledivibacter***  
KC668883.1, Coral - Red Sea  
KC668869.1, Coral - Red Sea  
KC668910.1, Coral - Red Sea  
EU573106, Produced water, 131°C in situ oil reservoir temperature - Ekofisk oil field, North Sea  
HQ696463, Deep sea sediment - Indian Ocean  
AB806232, Ocean drilling core - Shimokita Peninsula, Japan  
FJ203551, Coral - Caribbean  
FJ202390, Coral - Caribbean  
JQ515752, Coral - Caribbean  
KC631808, Hypersaline microbial mat - Kiribati  
EF123532, Coral - Caribbean  
DQ446118, Coral - Caribbean  
JX391232, Surface marine sediment - Hong Kong, China  
KC668891, Coral - Red Sea  
KT783480, *Wukongibacter baidiensis*, Deep sea hydrothermal field - Southwest Indian Ridge  
JMSU01000863, Marine intertidal flat - Wadden Sea, Germany  
AB806231, Ocean drilling core - Shimokita Peninsula, Japan

AM777975, Subterrestrial alkaline groundwater - Cabeco de Vide Aquifer, Portugal  
 AM777972, Subterrestrial alkaline groundwater - Cabeco de Vide Aquifer, Portugal  
 AY741712, Deep borehole water, gold mine - South Africa  
 AM778013, Subterrestrial alkaline groundwater - Cabeco de Vide Aquifer, Portugal  
 KX450231, *Thermodesulfitimonas autotrophica*, Terrestrial hot spring, 67 °C - Kuril Islands, Russia  
**ASV70, *Candidatus Desulfuridis***  
 KP151232, Thermophilic chicken dung  
 AY604055, Dolomite aquifer, 896 m depth - Chuniespoort group, South Africa  
 FJ712408, Submarine mud volcano, Kazan - East Mediterranean Sea  
 FJ712600, Submarine mud volcano, Kazan - East Mediterranean Sea  
 KP151255.1, Thermophilic chicken dung  
 KR013605.1, Anaerobic reactor sludge  
 LR640649.1, Wastewater treatment system  
 KP151232.1, Thermophilic chicken dung  
 LR640519.1, Wastewater treatment system  
 AM777962, Subterrestrial alkaline groundwater - Cabeco de Vide Aquifer, Portugal  
 GU188991, Subsurface observatory, 64°C fluids - Juan de Fuca, Pacific Ocean  
 EU731007, Fracture water from a borehole, 2.8 km depth - Witwatersrand Basin, South Africa  
 EU730994, Fracture water from a borehole, 2.8 km depth - Witwatersrand Basin, South Africa  
 EU730986, Fracture water from a borehole, 2.8 km depth - Witwatersrand Basin, South Africa  
 EU730992, Fracture water from a borehole, 2.8 km depth - Witwatersrand Basin, South Africa  
 EU730977, Fracture water from a borehole, 2.8 km depth - Witwatersrand Basin, South Africa  
 EU730976, Fracture water from a borehole, 2.8 km depth - Witwatersrand Basin, South Africa  
 EU730999, Fracture water from a borehole, 2.8 km depth - Witwatersrand Basin, South Africa  
 EU730997, Fracture water from a borehole, 2.8 km depth - Witwatersrand Basin, South Africa  
 EU731003, Fracture water from a borehole, 2.8 km depth - Witwatersrand Basin, South Africa  
 CP000860, Fracture water from a borehole, 2.8 km depth - Witwatersrand Basin, South Africa  
 EU730996, Fracture water from a borehole, 2.8 km depth - Witwatersrand Basin, South Africa  
 AY741715, Deep borehole water, gold mine - South Africa  
 AY741695, Deep borehole water, gold mine - South Africa  
 FR749980, *Caldicoprobacter faecalis*, Sewage sludge  
**ASV885, *Limnochorda***  
 AP014924  
 MN816750.1, Ultramafic hydrothermal setting  
 MG855670.1, Ultramafic hydrothermal setting  
 MG855671.1, Ultramafic hydrothermal setting  
 NR 136767.1, Sediment of meromictic lake - Japan  
 JF218025, Skin  
 AB374129, Hyperthermophilic, 65-80°C, anaerobic reactor  
 KF026007, thermophilic methane fermentation reactor  
 FN667455, Compost - Lahti, Finland  
 FN667408.1, Municipal drum compost  
 AB451833.1  
 MF080064.1, Sewage sludge  
 GU325833.1, Thermophilic, 58-65°C, sludge from wastewater - Co. Kerry, Ireland  
 KX955546.1, Water column and sediment - Aarhus Bay, Denmark  
 KU366344.1, Oil reservoir production fluids - HeNan oilfield, China  
 NR 075044.2  
 FR716211.1, Rice paddy soils  
 FN868427.1, Biogas reactors, mesophilic and thermophilic  
 KY313610.1, Thermophilic microbial fuel cell  
**ASV252, *Symbiobacterium***  
**ASV237, *Symbiobacterium***  
 AB361629, *Symbiobacterium ostreiconchae*, Oyster shell - Shizuoka, Japan  
 GU325835, Thermophilic, 58-65°C, sludge from wastewater - Co. Kerry, Ireland  
 FN667307, Compost - Lahti, Finland  
 AF190460, Compost  
 AB551168, Rice field soil - Yamagata, Japan  
 AP006840, *Symbiobacterium thermophilum* IAM 14863, Compost  
 JX133588.1, Soil  
 JX133637.1, Soil  
**ASV1878, *Desulfofarcimen***  
**ASV451, *Desulfofarcimen***  
 JX133637, Soil  
 JX133588, Soil  
 AB778029, Freshwater lake sediment, 42-45°C incubation - Lake Mizugaki, Japan  
 KT223435.1, Ship hull  
 NR 114368.1, Freshwater lake sediment - Lake Mizugaki, Japan  
 NR 114369.1, Freshwater lake sediment - Lake Mizugaki, Japan  
 AB778017, *Desulfofarcimen intricatum*, Freshwater lake sediment - Lake Mizugaki, Japan  
 AB778020, Freshwater lake sediment, 42-45°C incubation - Lake Mizugaki, Japan  
 AB778025, Freshwater lake sediment, 42-45°C incubation - Lake Mizugaki, Japan  
 JX133608, Soil  
 JX861507, *Desulfohalotomaculum peckii*, Anaerobic digester treating abattoir wastewater - Tunisia  
 JQ741980, Marine sediment - Yellow Sea, China  
 JQ741985, Marine sediment - Yellow Sea, China  
**ASV575, *Desulfohalotomaculum***  
**ASV775, *Desulfohalotomaculum***  
**ASV910, *Desulfohalotomaculum***  
 JQ304573.1, Marine sediment, 61°C incubation - Aarhus Bay, Denmark  
 JQ741980.1, Marine sediment - Yellow Sea, China  
**ASV299, *Desulfohalotomaculum***  
 JQ741985.1, Marine sediment - Yellow Sea, China  
 JQ304695, Marine sediment, 28-85°C incubation - Smeerenburgfjorden, Svalbard  
 JQ304694, Marine sediment, 28-85°C incubation - Smeerenburgfjorden, Svalbard  
 JQ304680.1, Marine sediment, 46°C incubation - Aarhus Bay, Denmark  
**ASV13, *Desulfohalotomaculum***  
**ASV655, *Desulfohalotomaculum***  
 FN652832.1, Marine sediment, 50°C incubation - Arctic  
 FN652831.1, Marine sediment, 50°C incubation - Arctic  
 FN652813.1, Marine sediment, 50°C incubation - Arctic  
 FN652828.1, Marine sediment, 50°C incubation - Arctic  
 FN652839.1, Marine sediment, 50°C incubation - Arctic

**ASV196, BRH-c8a**  
 JQ515747, Coral - Caribbean  
 FJ202905, Coral - Caribbean  
 JQ515758, Coral - Caribbean  
 LJQ515759, Coral - Caribbean  
 JQ245692.1, Terrestrial mud volcano - southwestern Taiwan  
 HF558577, Tailing material - Atacama Desert, Chile  
 JUED01000001, Deep subsurface Opalinus clay rock - Switzerland  
 AF295656, Pristine aquifer  
 LADP01000008, Deep subsurface Opalinus clay rock - Switzerland  
 EU651877, Biphenyl-degrading sulfate-reducing enrichment culture  
 LF558567, Tailing material - Atacama Desert, Chile  
 KC921180, Soil  
 LAB369052, Petroleum crude oil - Daqing, China  
 GU339478, Water sample from a natural gas storage aquifer, 800 m depth  
 DQ079642, Deep terrestrial subsurface fluid-filled fracture  
 DQ251790, Subsurface water - Kalahari Shield, South Africa  
 DQ230966, Subsurface water - Kalahari Shield, South Africa  
 DQ234643.1, Subsurface water - Kalahari Shield, South Africa  
 MF470644.1, Produced water, petroleum reservoir - China  
 MF470643.1, Produced water, petroleum reservoir - China  
 MF470774.1, Produced water, petroleum reservoir - China  
 Z26315, *Desulfallas thermosapovorans*, Enrichment culture inoculated with compost, 50 C incubation  
 AB436740.1, Thermophilic methanogenic sludge  
**ASV412, Desulfallas-Sporotomaculum**  
 AJ866942.1, Tidal flat sediment - North Sea, Germany  
 EU732645.1, Friedland clay, 50°C  
 KM870388.1, Landfill leachate - Russia  
 EU732646.1, Friedland clay, 50°C  
 AJ866941.1, Tidal flat sediment - North Sea, Germany  
**ASV438, Desulfallas-Sporotomaculum**  
 EU732612.1, Friedland clay, 50°C  
 AY069974.1, Methanogenic digester  
 EU732610.1, Friedland clay, 50°C  
 EU732648.1, Friedland clay, 50°C  
**ASV151, Desulfallas-Sporotomaculum**  
 IAY069974, Methanogenic digester  
 KT008120, Subsurface fracture water - Kidd Creek mine, Canada  
**ASV413, Desulfallas-Sporotomaculum**  
**ASV45, Desulfallas-Sporotomaculum**  
 HF558605.1, Mine tailing material - Atacama Desert, Chile  
 HF558605, Tailing material, copper mine - Atacama Desert, Chile  
 EF157217, Heavy oil seeps - Rancho La Brea tar pits, USA  
 JF514247.1  
 JF514247, Sea water - Xiaomaidao Island, China  
 AY548778, *Desulfallas alcoholivorax*, Fluidized-bed reactor treating acidic wastewater  
 JQ815727, River sediment - Tinto River, Spain  
 JQ420045.1, Tinto River sediments - Spain  
 JQ815734, River sediment - Tinto River, Spain  
 KF493715, Wastewater sludge - China  
 KF641512.1, Soil - Denmark  
 LEU651884, Biphenyl-degrading sulfate-reducing enrichment culture  
 JQ086982, Hydrocarbon contaminated aquifer - Leuna, Germany  
 DQ148942, *Desulfallas arcticus*, Fjord sediment - Svalbard  
 NR 043579.1, Marine sediment - Svalbard  
 FJ842595.1, Petroleum-contaminated aquifer sediment - California, USA  
 KC853521.1, Soil - Czech Republic  
 AF138734, *Thermoactinomyces intermedius*  
 GU984424.1, Anoxic rice field soil  
 MH337686.1, Pericarpium Citri Reticulatae Chachiensis  
 KX876698.1, Manure digestate  
 KT785247.1, Soil - China  
**ASV67, Thermoactinomyces**  
 KX875694.1, Manure digestate  
 KR086499.1, Surface layer sediments - East China Sea  
**ASV2086, Thermoactinomyces**  
**ASV1409, Thermoactinomyces**  
**ASV795, Thermoactinomyces**  
**ASV1752, Thermoactinomyces**  
 MF085332.1, Polycyclic aromatic hydrocarbon contaminated soil - China  
 MF085337.1, Polycyclic aromatic hydrocarbon contaminated soil - China  
 MJF01000073, *Vulcanibacillus modesticaldus*, Deep sea hydrothermal vents - Mid-Atlantic Ridge  
 AB260051.1, Crustal fluids, 64°C in situ temperature - Juan de Fuca Ridge  
 LAB260051, Crustal fluids, 64°C in situ temperature - Juan de Fuca Ridge  
 NR 042421.1  
**ASV9, Vulcanibacillus**  
 IAM050346  
 GQ267137.1, Hydrothermal sediments - Mofra Field, Juan de Fuca Ridge  
 HF558588.1, Mine tailing material - Atacama Desert, Chile  
 JQ519718.1, Water-flooded oil reservoir - China  
 HF558588, Mine tailings - Atacama Desert, Chile  
 KT308617, Textile industrial effluent  
 JQ723627, Biofilm in packed bed reactor  
 HM066356, Karst aquifer - Texas, USA  
 HM066339.1, Karst aquifer - Texas, USA  
 HM066339, Karst aquifer - Texas, USA  
 KJ650714, Mine tailing dump - Botswana  
**ASV30, Vulcanibacillus**  
 KJ650714.1, Sulfidic mine tailings - Botswana, Germany and Sweden  
 JQ087108, Hydrocarbon contaminated aquifer - Leuna, Germany  
 EU266886, Tar-oil contaminated aquifer sediments - Germany  
 FJ437869, Lake sample - Green Lake, USA  
 LKT308618, Textile industrial effluent  
 HQ183753, Landfill leachate sediment  
 HQ183754, Landfill leachate sediment  
 LHQ183755, Landfill leachate sediment



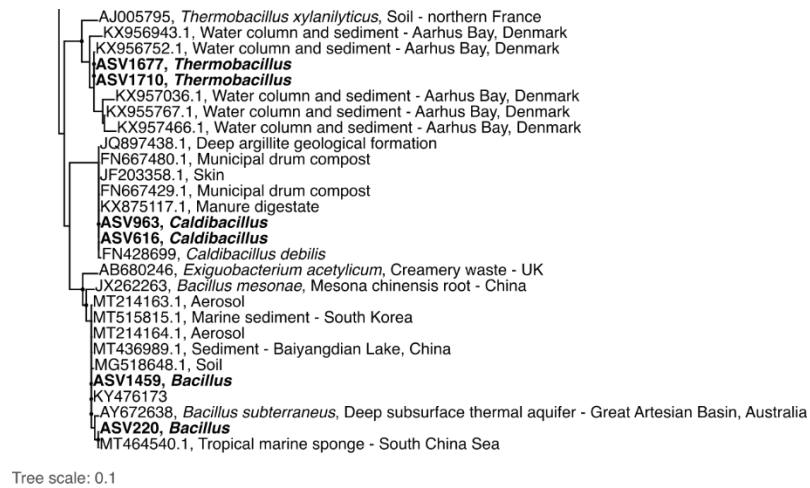

**Fig. S4. Phylogenetic association of seep-associated sequences with sequences from other environments.** Maximum likelihood tree showing phylogenetic relationships between 42 seep-associated ASVs (bold) and close relatives in the GenBank database. Black circles at the branch nodes indicate >80% bootstrap support (1,000 re-samplings). Scale bar indicates 10% sequence divergence as inferred from PhyML. *Pseudomonas aeruginosa* (accession number Z76672) was used as an outgroup to root the tree.

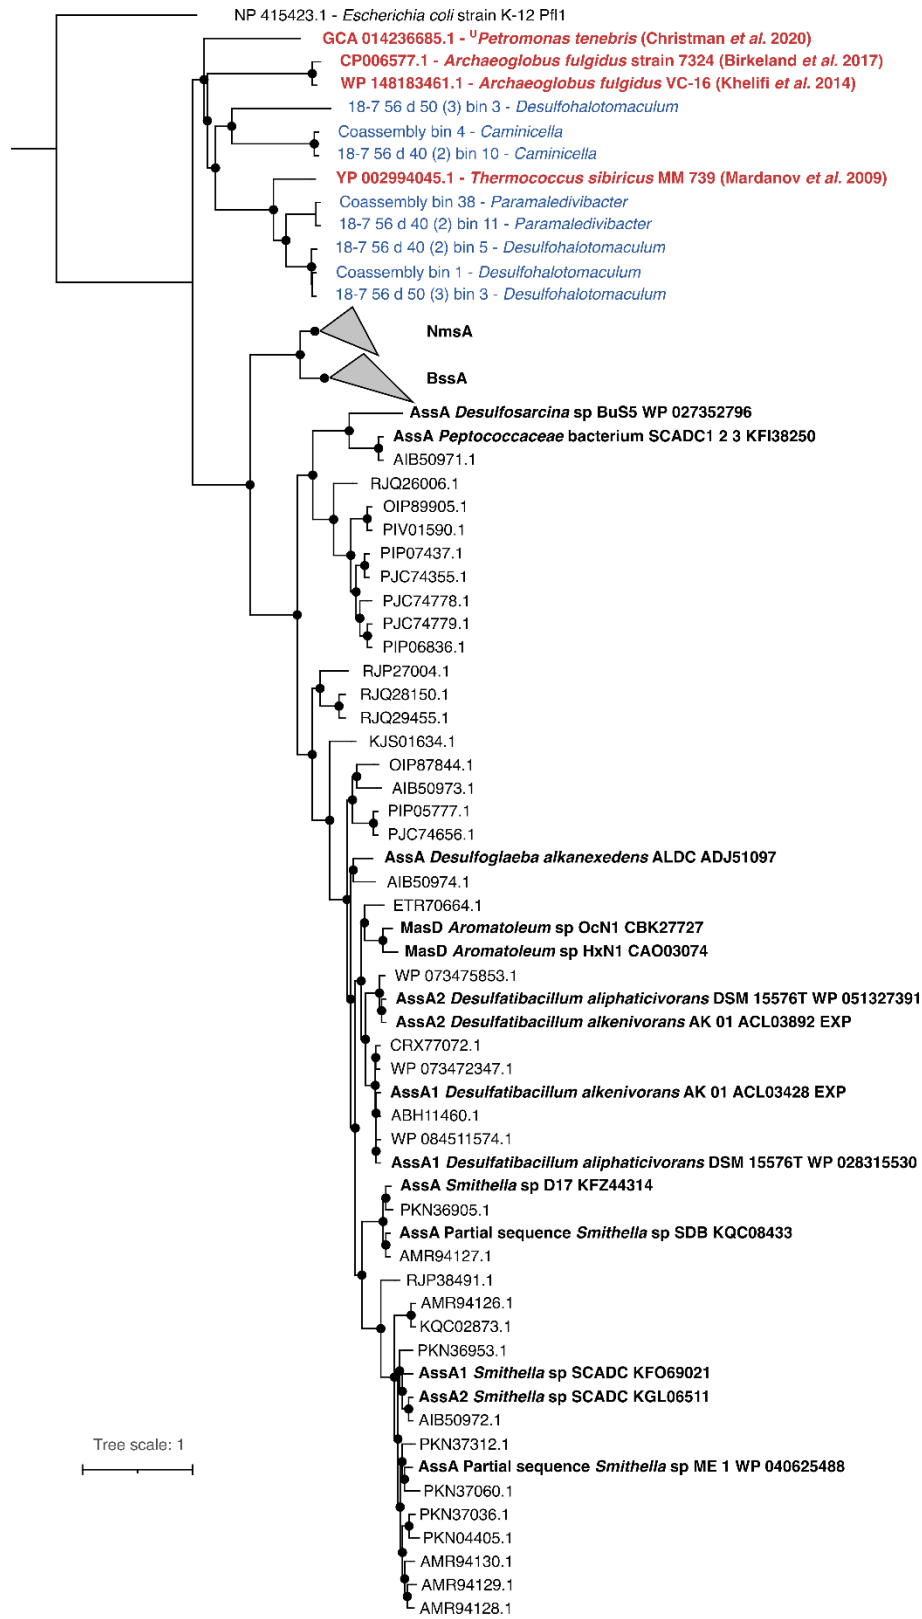

**Fig. S5. Phylogenetic relationships of putative glycy radical enzymes with alkylsuccinate synthases.** Putative anaerobic alkane-degrading pyruvate-formate lyase enzyme variants from *Desulfohalotomaculum*, *Caminiella* and *Parameldivibacter* thermophilic spores in this study (shown in blue) cluster together with homologous *pflD* gene sequences found in oil reservoir thermophiles <sup>U</sup>*Petromonas tenebris* (33), *Archaeoglobus fulgidus* strain 7324 (37), and *Thermococcus sibiricus* strain MM 739 (38) shown in red. Isolated strains of *Archaeoglobus* and *Thermococcus* have been shown to degrade alkanes in pure culture at high temperature under anaerobic conditions (86, 38). These *pflD* gene sequences, as well as reference sequences of alkane succinate synthase (*AssA* and *MasD*) genes also having experimental verification of anaerobic alkane degradation, are shown in bold. Benzyl succinate synthase (*BssA*) and naphthyl-2-methylsuccinate synthase (*NmsA*) sequences are represented by collapsed clades. Black circles at the branch nodes indicate >80% bootstrap support (1,000 re-samplings). Scale bar indicates 10% sequence divergence as inferred from PhyML. A sequence of pyruvate formate lyase (*Pfl*) from *E. coli* was used to root the tree.

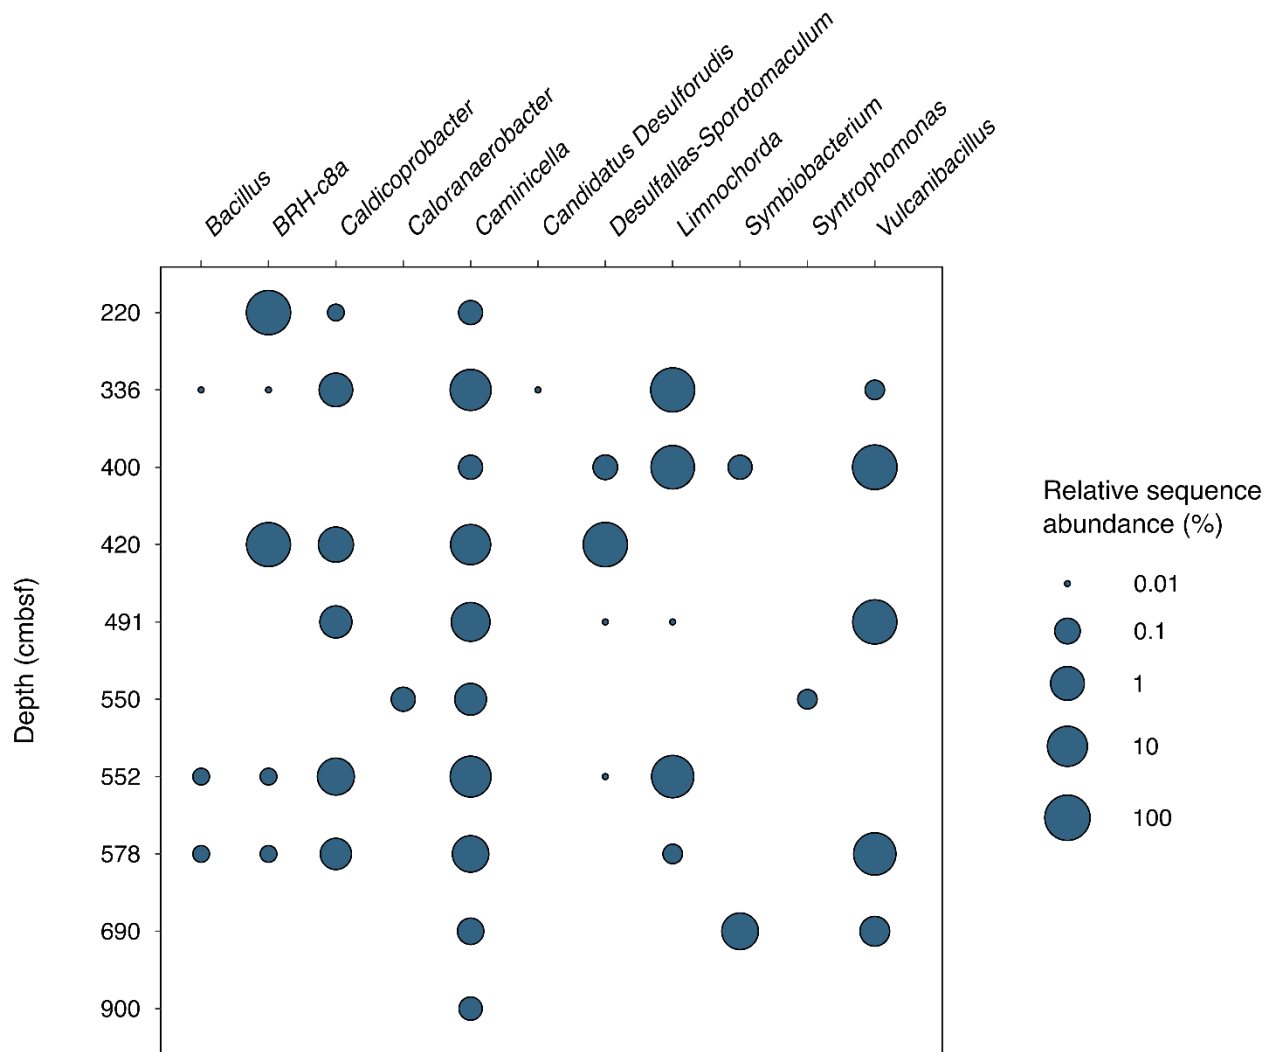

**Fig. S6. Endospores remain viable during burial.** Detection of endospore-forming bacteria with the same taxonomic classification as seep-associated ASVs (cf. table S5) in deeper Scotian Slope sediment layers following incubation at 50°C. Size of the circles indicates the maximum relative sequence abundance of a taxon in unrarefied sequence libraries at the indicated depth. Based on sediment accumulation rates of 0.1 to 0.2 mm y<sup>-1</sup> reported in the study area (45, 46), these results confirm spore viability over a 90–180 ka period corresponding to the deepest piston cores (9 mbsf) that were obtained in this study.

**Movie S1. Seabed hydrocarbon seepage.** Video footage collected using an underwater remotely operated vehicle (ROV) of seabed geofluid flow in the study area (56). Vertical hydrocarbon migration rates from a subsurface reservoir to the seabed can be estimated using buoyancy models incorporating Darcy's law (41) and estimates on the order of  $10 \text{ cm d}^{-1}$  reported for seepage of hydrocarbons (42).

**Table S1. Marine sediment core site locations and sample descriptions.** Core number, expedition name, date of core collection, latitude, longitude, water depth, core type and core length.

**Table S2. Hydrocarbon geochemical measurements on marine sediment cores.** Measurements of interstitial gas composition, interstitial gas isotopes, gas chromatography of the extractable organic matter, and GC-MS of the saturated and aromatic hydrocarbon fractions.

**Table S3. ASV table with taxonomic classification of 16S rRNA gene amplicon libraries.** Data from 14 core sediments, in triplicate, before incubation (0 d; post-pasteurization) and after 28 (28 d) or 56 (56 d) days of incubation at 40, 50, or 60°C, subsampled to 4,635 sequences.

**Table S4. Analysis of similarity (ANOSIM) test results.** Microbial community composition differences between subsets of the 16S rRNA gene amplicon libraries for groups of core sediments.

**Table S5. IndicSpecies Stat values.** Data showing significant associations ( $P < 0.05$ ) of *Firmicutes* ASVs to sediments with geochemical evidence of thermogenic hydrocarbons ( $n=2$ ) when tested against sediments without geochemical evidence of thermogenic hydrocarbons ( $n=8$ ) after combined 28 and 56 days of incubation.

**Table S6. Taxonomic assignment.** Taxonomy (Silva version 138) of 10,860,283 curated 16S rRNA sequences from 59 oil reservoir sequencing surveys.

**Table S7. Metagenome-assembled genomes (MAGs).** MAG taxonomic classification, completeness (%), contamination (%), genome size (Mbp), GC content, strain heterogeneity, predicted genes and coding density, as well as MAG to amplicon sequence variant (ASV) correlation.

**Table S8. Summary of genes detected in metagenome-assembled genomes (MAGs).** Genes identified to be required for dissimilatory sulfate reduction, fermentation, hydrocarbon activation, sporulation, glycolysis, and the TCA cycle.

**Table S9. Sporulation genes annotated against Pfam, TIGRFAM and Swiss-Prot databases.**  
Data includes sporulation genes detected in 15 MAGs.

## REFERENCES AND NOTES

1. C. Darwin, *On the Origin of Species by Means of Natural Selection, or Preservation of Favoured Races in the Struggle for Life* (J. Murray, 1859).
2. L. G. M. Baas Becking, *Geobiologie of Inleiding Tot de Milieukunde* (W. P. Van Stockum & Zoon, 1934).
3. C. A. Hanson, J. A. Fuhrman, M. C. Horner-Devine, J. B. H. Martiny, Beyond biogeographic patterns: Processes shaping the microbial landscape. *Nat. Rev. Microbiol.* **10**, 497–506 (2012).
4. B. A. Ward, B. B. Cael, S. Collins, C. R. Young, Selective constraints on global plankton dispersal. *Proc. Natl. Acad. Sci. U.S.A.* **118**, e2007388118 (2021).
5. B. Setlow, S. Atluri, R. Kitchel, K. Koziol-Dube, P. Setlow, Role of dipicolinic acid in resistance and stability of spores of *Bacillus subtilis* with or without DNA-protective  $\alpha/\beta$ -type small acid-soluble proteins. *J. Bacteriol.* **188**, 3740–3747 (2006).
6. J. S. Fang, C. Kato, G. M. Runko, Y. Nogi, T. Hori, J. T. Li, Y. Morono, F. Inagaki, Predominance of viable spore-forming piezophilic bacteria in high-pressure enrichment cultures from ~1.5 to 2.4 km-deep coal-bearing sediments below the ocean floor. *Front. Microbiol.* **8**, 137 (2017).
7. J. T. Lennon, S. E. Jones, Microbial seed banks: The ecological and evolutionary implications of dormancy. *Nat. Rev. Microbiol.* **9**, 119–130 (2011).
8. M. Mestre, J. Höfer, The microbial conveyor belt: Connecting the globe through dispersion and dormancy. *Trends Microbiol.* **29**, 482–492 (2021).
9. Y. M. Bar-On, R. Phillips, R. Milo, The biomass distribution on Earth. *Proc. Natl. Acad. Sci. U.S.A.* **115**, 6506–6511 (2018).
10. V. B. Heuer, F. Inagaki, Y. Morono, Y. Kubo, A. J. Spivack, B. Viehweger, T. Treude, F. Beulig, F. Schubotz, S. Tonai, S. A. Bowden, M. Cramm, S. Henkel, T. Hirose, K. Homola, T. Hoshino, A. Ijiri, H. Imachi, N. Kamiya, M. Kaneko, L. Lagostina, H. Manners, H. McClelland, K. Metcalfe, N. Okutsu, D. Pan, M. J. Raudsepp, J. Sauvage, M. Tsang, D. T. Wang, E. Whitaker, Y. Yamamoto, K. Yang, L. Maeda, R. R. Adhikari, C. Glombitza, Y. Hamada, J. Kallmeyer, J. Wendt, L. Wörmer, Y. Yamada, M. Kinoshita, K. Hinrichs, Temperature limits to deep seafloor life in the Nankai Trough subduction zone. *Science* **370**, 1230–1234 (2020).
11. L. Wörmer, T. Hoshino, M. W. Bowles, B. Viehweger, R. R. Adhikari, N. Xiao, G. Uramoto, M. Könneke, C. S. Lazar, Y. Morono, F. Inagaki, K. Hinrichs, Microbial dormancy in the marine subsurface: Global endospore abundance and response to burial. *Sci. Adv.* **5**, eaav1024 (2019).
12. B. A. Lomstein, A. T. Langerhuus, S. D'Hondt, B. B. Jørgensen, A. J. Spivack, Endospore abundance, microbial growth and necromass turnover in deep sub-seafloor sediment. *Nature* **484**, 101–104 (2012).



13. C. R. Hubert, T. B. Oldenburg, M. Fustic, N. D. Gray, S. R. Larter, K. Penn, A. K. Rowan, R. Seshadri, A. Sherry, R. Swainsbury, Massive dominance of *Epsilonproteobacteria* in formation waters from a Canadian oil sands reservoir containing severely biodegraded oil. *Environ. Microbiol.* **14**, 387–404 (2012).
14. V. J. Orphan, L. T. Taylor, D. Hafenbradl, E. F. Delong, Culture-dependent and culture independent characterization of microbial assemblages associated with high-temperature petroleum reservoirs. *Appl. Environ. Microbiol.* **66**, 700–711 (2001).
15. Vigneron, E. B. Alsop, B. P. Lomans, N. C. Kyrpides, I. M. Head, N. Tsesmetzis, Succession in the petroleum reservoir microbiome through an oil field production lifecycle. *ISME J.* **11**, 2141–2154 (2017).
16. B. Bennett, J. J. Adams, N. D. Gray, A. Sherry, T. B. P. Oldenburg, H. Huang, S. R. Larter, I. M. Head, The controls on the composition of biodegraded oils in the deep subsurface—Part 3. The impact of microorganism distribution on petroleum geochemical gradients in biodegraded petroleum reservoirs. *Org. Geochem.* **56**, 94–105 (2013).
17. A. G. Judd, The global importance and context of methane escape from the seabed. *Geo-Mar. Lett.* **23**, 147–154 (2003).
18. A. L. Müller, J. R. de Rezende, C. R. J. Hubert, K. U. Kjeldsen, I. Lagkouravdos, D. Berry, B. B. Jørgensen, A. Loy, Endospores of thermophilic bacteria as tracers of microbial dispersal by ocean currents. *ISME J.* **8**, 1153–1165 (2014).
19. C. A. Hanson, A. L. Müller, A. Loy, C. Dona, R. Appel, B. B. Jørgensen, C. R. J. Hubert, Historical factors associated with past environments influence the biogeography of thermophilic endospores in Arctic marine sediments. *Front. Microbiol.* **10**, 245 (2019).
20. C. Hubert, A. Loy, M. Nickel, C. Arnosti, C. Baranyi, V. Bruchert, T. Ferdelman, K. Finster, F. M. Christensen, J. R. de Rezende, V. Vandieken, B. B. Jørgensen, A constant flux of diverse thermophilic bacteria into the cold Arctic seabed. *Science* **325**, 1541–1544 (2009).
21. I. R. MacDonald, Natural and unnatural oil slicks in the Gulf of Mexico. *J. Geophys. Res. Oceans* **120**, 8364–8380 (2015).
22. A. Chakraborty, E. Ellefson, C. Li, D. Gittins, J. M. Brooks, B. B. Bernard, C. R. J. Hubert, Thermophilic endospores associated with migrated thermogenic hydrocarbons in deep Gulf of Mexico marine sediments. *ISME J.* **12**, 1895–1906 (2018).
23. A. Chakraborty, S. E. Ruff, X. Dong, E. D. Ellefson, C. Li, J. M. Brooks, J. McBee, B. B. Bernard, C. R. J. Hubert, Hydrocarbon seepage in the deep seabed links subsurface and seafloor biospheres. *Proc. Natl. Acad. Sci. U.S.A.* **117**, 11029–11037 (2020).
24. J. Kallmeyer, R. Pockalny, R. R. Adhikari, D. C. Smith, S. D'Hondt, Global distribution of microbial abundance and biomass in subseafloor sediment. *Proc. Natl. Acad. Sci. U.S.A.* **109**, 16213–16216 (2012).

25. M. A. Abrams, Marine seepage variability and its impact on evaluating the surface migrated hydrocarbon seep signal. *Mar. Pet. Geol.* **121**, 104600 (2020).
26. N. C. Nanda, Direct hydrocarbon indicators (DHI), in *Seismic Data Interpretation and Evaluation for Hydrocarbon Exploration and Production*, N. C. Nanda, Ed. (Springer, 2016), pp. 103–113.
27. A. G. Judd, M. Hovland, in *Seabed Fluid Flow: The Impact on Geology, Biology and the Marine Environment* (Cambridge Univ. Press, 2007), pp. 163–178.
28. L. B. Magoon, W. G. Dow, *The Petroleum System—From Source to Trap* (American Association of Petroleum Geologists, 1994).
29. M. Y. Galperin, Genome diversity of spore-forming *Firmicutes*. *Microbiol. Spectr.* **1**, 10.1128/microbiolspectrum.TBS-0015-2012 (2013).
30. J. R. de Rezende, C. R. J. Hubert, H. Røy, K. U. Kjeldsen, B. B. Jørgensen, Estimating the abundance of endospores of sulfate-reducing bacteria in environmental samples by inducing germination and exponential growth. *Geomicrobiol. J.* **34**, 338–345 (2017).
31. T. Wunderlin, T. Junier, L. Roussel-Delif, N. Jeanneret, P. Junier, Endospore-enriched sequencing approach reveals unprecedented diversity of Firmicutes in sediments. *Environ. Microbiol. Rep.* **6**, 631–639 (2014).
32. H. Dahle, F. Garshol, M. Madsen, N. L. Birkeland, Microbial community structure analysis of produced water from a high-temperature North Sea oil-field. *Antonie Van Leeuwenhoek* **93**, 37–49 (2008).
33. G. D. Christman, R. I. León-Zayas, R. Zhao, Z. M. Summers, J. F. Biddle, Novel clostridial lineages recovered from metagenomes of a hot oil reservoir. *Sci. Rep.* **10**, 8048 (2020).
34. D. M. Jones, I. M. Head, N. D. Gray, J. J. Adams, A. K. Rowan, C. M. Aitken, B. Bennett, H. Huang, A. Brown, B. F. J. Bowler, T. Oldenburg, M. Erdmann, S. R. Larter. Crude-oil biodegradation via methanogenesis in subsurface petroleum reservoirs. *Nature* **451**, 176–180 (2008).
35. N. D. Gray, A. Sherry, S. R. Larter, M. Erdmann, J. Leyris, T. Liengen, J. Beeder, I. M. Head, Biogenic methane production in formation waters from a large gas field in the North Sea. *Extremophiles* **13**, 511–519 (2009).
36. V. Khot, J. Zorz, D. A. Gittins, A. Chakraborty, E. Bell, M. A. Bautista, A. J. Paquette, A. K. Hawley, B. Novotnik, C. R. J. Hubert, M. Strous, S. Bhatnagar, CANT-HYD: A curated database of phylogeny-derived Hidden Markov Models for annotation of marker genes involved in hydrocarbon degradation. *Front. Microbiol.* **12**, 764058 (2022).
7. N. K. Birkeland, P. Schönheit, L. Poghosyan, A. Fiebig, H. P. Klenk, Complete genome sequence analysis of *Archaeoglobus fulgidus* strain 7324 (DSM 8774), a hyperthermophilic archaeal sulfate reducer from a North Sea oil field. *Stand Genomic Sci.* **12**, 79 (2017).

38. A. V. Mardanov, N. V. Ravin, V. A. Svetlitchnyi, A. V. Beletsky, M. L. Miroshnichenko, E. A. Bonch-Osmolovskaya, K. G. Skryabin, Metabolic versatility and indigenous origin of the archaeon *Thermococcus sibiricus*, isolated from a Siberian oil reservoir, as revealed by genome analysis. *Appl. Environ. Microbiol.* **75**, 4580–4588 (2009).
39. J. A. Hoch, Regulation of the phosphorelay and the initiation of sporulation in *Bacillus subtilis*. *Annu. Rev. Microbiol.* **47**, 441–465 (1993).
40. M. E. Deptuck, K. L. Kendell, “Atlas of 3D seismic surfaces and thickness maps, central and southwestern Scotian Slope” (Geoscience Open File Report 2020-002MF and Geoscience Open File Report 2020-001MF to 006MF, Canada-Nova Scotia Offshore Petroleum Board, 2020).
41. G. K. Arp, Effusive microseepage: A first approximation model for light hydrocarbon movement in the subsurface. *Assoc. Pet. Geol. Bull.* **8**, 1–17 (1992).
42. G. K. Rice, Vertical migration in theory and in practice. *Interpretation* **10**, SB17–SB26 (2022).
43. C. G. Hannah, J. A. Shore, J. W. Loder, C. E. Naimie, Seasonal circulation on the western and central Scotian Shelf. *J. Phys. Oceanogr.* **31**, 591–615 (2001).
44. J. R. de Rezende, K. U. Kjeldsen, C. R. J. Hubert, K. Finster, A. Loy, B. B. Jørgensen, Dispersal of thermophilic *Desulfotomaculum* endospores into Baltic Sea sediments over thousands of years. *ISME J.* **7**, 72–84 (2013).
45. K. A. Jenner, D. C. Campbell, J. M. Barnett, J. Higgins, A. Normandeau, Piston cores and supporting high-resolution seismic data, CCGS Hudson Expedition 2015018, Scotian Slope, Canada (Open File 8637, Geological Survey of Canada).
46. D. J. W. Piper, K. I. Skene, Latest Pleistocene ice-rafting events on the Scotian Margin (eastern Canada) and their relationship to Heinrich events. *Paleoceanography* **13**, 205–214 (1998).
47. J. W. Lund, L. Bjelm, G. Bloomquist, A. K. Mortensen, Characteristics, development and utilization of geothermal resources—A Nordic perspective. *Episodes* **31**, 140–147 (2008).
48. F. Beulig, F. Schubert, R. R. Adhikari, C. Glombitza, V. B. Heuer, K. U. Hinrichs, K. L. Homola, F. Inagaki, B. B. Jørgensen, J. Kallmeyer, S. J. Krause, Rapid metabolism fosters microbial survival in the deep, hot subseafloor biosphere. *Nat. Commun.* **13**, 312 (2022).
49. Y. Morono, M. Ito, T. Hoshino, T. Terada, T. Hori, M. Ikehara, S. D’Hondt, F. Inagaki, Aerobic microbial life persists in oxic marine sediment as old as 101.5 million years. *Nat. Commun.* **11**, 3626 (2020).
50. A. Wilhelms, S. R. Larter, I. Head, P. Farrimond, R. di-Primio, C. Zwach, Biodegradation of oil in uplifted basins prevented by deep-burial sterilization. *Nature* **411**, 1034–1037 (2001).

51. J. F. Biddle, J. B. Sylvan, W. J. Brazelton, B. J. Tully, K. J. Edwards, C. L. Moyer, J. F. Heidelberg, W. C. Nelson, Prospects for the study of evolution in the deep biosphere. *Front. Microbiol.* **2**, 285 (2012).
52. M. D. Lynch, J. D. Neufeld, Ecology and exploration of the rare biosphere. *Nat. Rev. Microbiol.* **13**, 217–229 (2015).
53. D. C. Campbell, A. W. A. MacDonald, CCGS Hudson Expedition 2015–018 Geological investigation of potential seabed seeps along the Scotian Slope, June 25–July 9, 2015 (Open File 8116, Geological Survey of Canada, 2016).
54. D. C. Campbell, CCGS Hudson Expedition 2016–011, phase 2. Cold seep investigations on the Scotian Slope, offshore Nova Scotia, June 15–July 6, 2016 (Open File 8525, Geological Survey of Canada, 2019).
55. D. C. Campbell, A. Normandeau, CCGS Hudson Expedition 2018–041: High-resolution investigation of deep-water seabed seeps and landslides along the Scotian Slope, offshore Nova Scotia, May 26–June 15, 2018 (Open File 8567, Geological Survey of Canada, 2019).
56. R. Bennett, P.-A. Desiagne, Expedition report 21CONDOR: Scotian Slope, August 14–29, 2021 (Open File 8889, Geological Survey of Canada, 2022).
57. M. F. Isaksen, F. Bak, B. B. Jørgensen, Thermophilic sulfate-reducing bacteria in cold marine sediment. *FEMS Microbiol. Ecol.* **14**, 1–8 (1994).
58. A. Klindworth, E. Pruesse, T. Schweer, J. Peplies, C. Quast, M. Horn, F. O. Glöckner, Evaluation of general 16S ribosomal RNA gene PCR primers for classical and next-generation sequencing-based diversity studies. *Nucleic Acids Res.* **41**, e1 (2013).
59. M. Martin, Cutadapt removes adapter sequences from high-throughput sequencing reads. *EMBnet J.* **17**, 10–12 (2011).
60. J. Callahan, P. J. McMurdie, M. J. Rosen, A. W. Han, A. J. A. Johnson, and S. P. Holmes, DADA2: High-resolution sample inference from Illumina amplicon data. *Nat. Methods* **13**, 581–583 (2016).
61. R Core Team, R: A language and environment for statistical computing (R Foundation for Statistical Computing, 2014); [www.R-project.org/](http://www.R-project.org/).
62. C. Quast, E. Pruesse, P. Yilmaz, J. Gerken, T. Schweer, P. Yarza, J. Peplies, F. O. Glöckner, The SILVA ribosomal RNA gene database project: Improved data processing and web-based tools. *Nucleic Acids Res.* **41**, 590–596 (2013).
63. P. J. McMurdie, S. Holmes, Phyloseq: An R package for reproducible interactive analysis and graphics of microbiome census data. *PLOS ONE* **8**, e61217 (2013).
64. D. Li, C.-M. Liu, R. Luo, K. Sadakane, T.-W. Lam, MEGAHIT: An ultra-fast single-node solution for large and complex metagenomics assembly via succinct de Bruijn graph. *Bioinformatics* **31**, 1674–1676 (2015).

65. D. D. Kang, F. Li, E. Kirton, A. Thomas, R. Egan, H. An, Z. Wang, MetaBAT 2: An adaptive binning algorithm for robust and efficient genome reconstruction from metagenome assemblies. *PeerJ*. **7**, e7359 (2019).
66. D. H. Parks, M. Imelfort, C. T. Skennerton, P. Hugenholtz, G. W. Tyson, CheckM: Assessing the quality of microbial genomes recovered from isolates, single cells, and metagenomes. *Genome Res.* **25**, 1043–1055 (2015).
67. H. R. Gruber-Vodicka, B. K. B. Seah, E. Pruesse, phyloFlash: Rapid small-subunit rRNA profiling and targeted assembly from metagenomes. *mSystems* **5**, e00920-20 (2020).
68. X. Dong, M. Strous, An integrated pipeline for annotation and visualization of metagenomic contigs. *Front. Genet.* **10**, 999 (2019).
69. E. D. Graham, J. F. Heidelberg, B. J. Tully, Potential for primary productivity in a globally-distributed bacterial phototroph. *ISME J.* **350**, 1–6 (2018).
70. M. Kanehisa, Y. Sato, K. Morishima, BlastKOALA and GhostKOALA: KEGG tools for functional characterization of genome and metagenome sequences. *J. Mol. Biol.* **428**, 726–731 (2016).
71. D. Hyatt, G.-L. Chen, P. F. LoCascio, M. L. Land, F. W. Larimer, L. J. Hauser, Prodigal: Prokaryotic gene recognition and translation initiation site identification. *BMC Bioinformatics* **11**, 119 (2010).
72. P. A. Chaumeil, A. J. Mussig, P. Hugenholtz, D. H. Parks, GTDB-Tk: A toolkit to classify genomes with the genome taxonomy database. *Bioinformatics* **36**, 1925–1927 (2019).
73. P. D. Schloss, S. L. Westcott, T. Ryabin, J. R. Hall, M. Hartmann, E. B. Hollister, R. A. Lesniewski, B. B. Oakley, D. H. Parks, C. J. Robinson, J. W. Sahl, B. Stres, G. G. Thallinger, D. J. Van Horn, C. F. Weber, Introducing mothur: Open-source, platform-independent, community-supported software for describing and comparing microbial communities. *Appl. Environ. Microbiol.* **75**, 7537–7541 (2009).
74. M. R. Olm, C. T. Brown, B. Brooks, J. F. Banfield, dRep: A tool for fast and accurate genomic comparisons that enables improved genome recovery from metagenomes through de-replication. *ISME J.* **11**, 2864–2868 (2017).
75. R. Leinonen, H. Sugawara, M. Shumway, The sequence read archive. *Nucleic Acids Res.* **39**, D19–D21 (2011).
76. T. Rognes, T. Flouri, B. Nichols, C. Quince, F. Mahé, VSEARCH: A versatile open source tool for metagenomics. *PeerJ* **4**, e2584 (2016).
77. J. Oksanen, R. Kindt, P. Legendre, B. O’Hara, *The Vegan Package—Community Ecology Package. R package version 2.0–9* (2007).
78. H. Wickham, *ggplot2: Elegant Graphics for Data Analysis* (Springer, ed. 3, 2009).

79. M. De Cáceres, P. Legendre, M. Moretti, Improving indicator species analysis by combining groups of sites. *Oikos* **119**, 1674–1684 (2010).
80. E. Pruesse, J. Peplies, F. O. Glöckner, SINA: Accurate high-throughput multiple sequence alignment of ribosomal RNA genes. *Bioinformatics* **28**, 1823–1829 (2012).
81. W. Ludwig, O. Strunk, R. Westram, L. Richter, H. Meier, Yadhukumar, A. Buchner, T. Lai, S. Steppi, G. Jobb, W. Förster, I. Brettske, S. Gerber, A. W. Ginhart, O. Gross, S. Grumann, S. Hermann, R. Jost, A. König, T. Liss, R. Lüssmann, M. May, B. Nonhoff, B. Reichel, R. Strehlow, A. Stamatakis, N. Stuckmann, A. Vilbig, M. Lenke, T. Ludwig, A. Bode, K. Schleifer, ARB: A software environment for sequence data. *Nucleic Acids Res.* **32**, 1363–1371 (2004).
82. I. Letunic, P. Bork, Interactive tree of life (iTOL) v4: Recent updates and new developments. *Nucleic Acids Res.* **47**, W256–W259 (2019).
83. B. A. Lomstein, B. B. Jørgensen, Pre-column liquid chromatographic determination of dipicolinic acid from bacterial endospores. *Limnol. Oceanogr. Methods* **10**, 227–233 (2012).
84. J. E. Rattray, A. Chakraborty, C. Li, G. Elizondo, N. John, M. Wong, J. R. Radović, T. B. P. Oldenburg, C. R. J. Hubert, Sensitive quantification of dipicolinic acid from bacterial endospores in soils and sediments. *Environ. Microbiol.* **23**, 1397–1406 (2021).
85. J. Fichtel, J. Köster, J. Rullkötter, H. Sass, Spore dipicolinic acid contents used for estimating the number of endospores in sediments. *FEMS Microbiol. Ecol.* **61**, 522–532 (2007).
6. N. Khelifi, O. A. Ali, P. Roche, V. Grossi, C. Brochier-Armanet, O. Valette, B. Ollivier, A. Dolla, A. Hirschler-Réa, Anaerobic oxidation of long-chain *n*-alkanes by the hyperthermophilic sulfate-reducing archaeon, *Archaeoglobus fulgidus*. *ISME J.* **8**, 2153–2166 (2014).
